# Supplementary material
Source: MDPI journal article supplement (https://www.mdpi.com/2226-4310/10/9/800)
Supplement: s1 [file s1]

# Supplementary Materials

## Combustion Characteristics of HTPB-Based Hybrid Rocket Fuels: Using Nickel Oxide as the Polymer Matrix Pyrolysis Catalyst

Hongsheng Yu <sup>1,2</sup>, Xiaodong Yu <sup>1,2</sup>, Hongwei Gao <sup>1,2</sup>, Luigi T. DeLuca <sup>1,3</sup>, Wei Zhang <sup>1,2,\*</sup> and Ruiqi Shen <sup>1,2,\*</sup>

1 Institute of Space Propulsion, Nanjing University of Science and Technology, Nanjing 210094, China; hongshengyu2017@foxmail.com (H.Y.)

2 Micro-Nano Energetic Devices Key Laboratory of MIIT, Nanjing 210094, China

3 Space Propulsion Laboratory (SPLab), Department of Aerospace Science and Technology, Politecnico di Milano, 20156 Milan, Italy

\* Correspondence: wzhang@njust.edu.cn (W.Z.); rqshen@njust.edu.cn (R.S.)

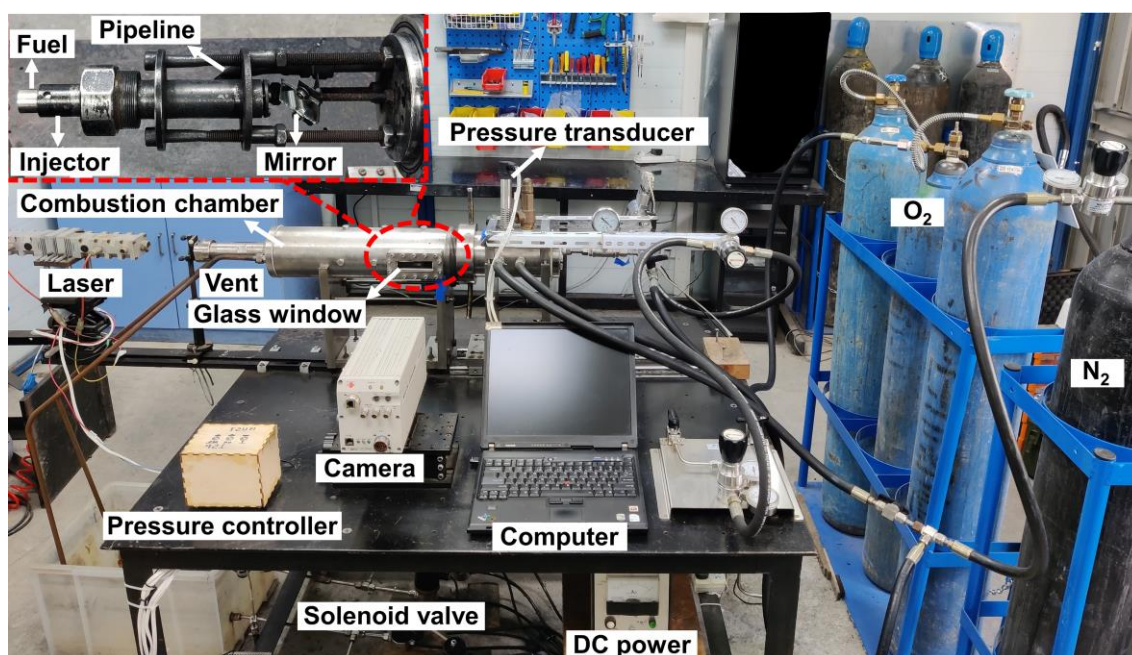

Figure S1. The physical picture of the 2D-radial hybrid burner [31].

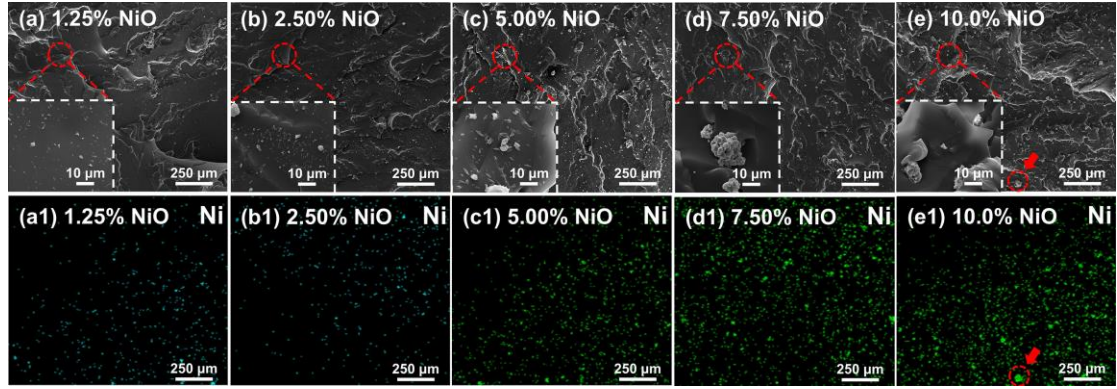

**Figure S2.** The surface morphology of the NiO-loaded fuels. (a) - (e) SEM images of the NiO-loaded fuels; (a1) - (e1) EDS mapping images of the NiO-loaded fuels

**Table S1.** Thermal conductivity of the pure HTPB and NiO-loaded fuels.

| Formulation | Thermal conductivity, W/mK |
|-------------|----------------------------|
| Pure HTPB   | 0.19763                    |
| 1.25% NiO   | 0.20480                    |
| 2.50% NiO   | 0.20725                    |
| 5.00% NiO   | 0.20723                    |
| 7.50% NiO   | 0.20840                    |
| 10.0% NiO   | 0.21070                    |

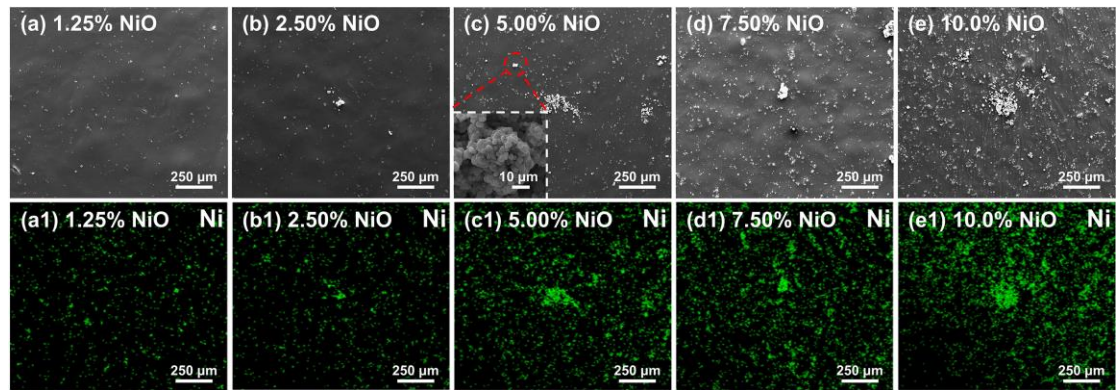

**Figure S3.** Fuel surface features of the NiO-loaded fuels after combustion termination. (a)-(e) SEM images of the NiO-loaded fuels; (a1)-(e1) EDS mapping images of NiO-loaded fuels.
